# Supplementary material for: Widespread chytrid infection across frogs in the Peruvian Amazon suggests critical role for low elevation in pathogen spread and persistence
Source: PLoS One. 2019 Oct 16;14(10):e0222718. doi: 10.1371/journal.pone.0222718 (PMC6795419; doi:10.1371/journal.pone.0222718)
Supplement: S2 Table — Primers used in PCR and sequencing. (XLSX) [file pone.0222718.s002.xlsx]

## Sheet: Sheet1
Primer	Sequence	References
ITS-1	5'-CCTTGATATAATACAGTGTGCCATATGTC-3'	Boyle et al. 2004
5.8S	5'-AGCCAAGAGATCCGTTGTCAAA-3'	Boyle et al. 2004
Probe	5'-6FAM-CGAGTCGAACAAAAT-MGBNFQ-3'	Boyle et al. 2004
8009x2F	5’-TCGTGAAGAGCTTGGAAAGTCG-3’	Morgan et al. 2007
8009x2R	5’-AGTTCTGTCGTCAATGCTGTAGGG-3’	Morgan et al. 2007
R6064F	5’-CTATCTGCGCTCCCGTGTCAA-3’	Morehouse et al. 2003
R6064R	5’-AGGGCTGCAACAACTGGATTT-3’	Morehouse et al. 2003
BdC5F	5’-TAATAGCGCCGACCGAACTA-3’	James et al. 2009
BdC5R	5’-ATGCCAAACCATGAGCAAAT-3’	James et al. 2009
BdSC3.1F	5’-CAGTGACTTGCATCCACGAG-3’	Schloegel et al. 2012
BdSC3.1R	5’-AATCGCTTCAACCAAACTGG-3’	Schloegel et al. 2012
BdSC4.16F	5’-TCAACTGGCTTTGAGCACAC-3’	Schloegel et al. 2012
BdSC4.16R	5’-ATAGAGCATGCAGATCGCTTT-3’	Schloegel et al. 2012
BdSC6.15F	5’-GACGATAAAACGACAACAATCG-3’	Schloegel et al. 2012
BdSC6.15R	5’-CCCTTTTTAGGTTGGCTTGC-3’	Schloegel et al. 2012
BdSC6.8F	5'-CCACTTCAAACACGTTCATTG-3'	Jenkinson et al. 2016
BdSC6.8R	5'-GTTTGGATTCCGAATGCTTG-3'	Jenkinson et al. 2016
16SARF	5'-CGCCTGTTTATCAAAAACAT-3'	Palumbi 1991
16SBRR	5'-CCGGTCTGAACTCAGATCACGT-3'	Palumbi 1991
